# Supplementary material for: Evidence of Antimicrobial Resistance in Bats and Its Planetary Health Impact for Surveillance of Zoonotic Spillover Events: A Scoping Review
Source: Preprints.org preprint supplement (doi:10.20944/preprints202211.0183.v1), 2022-11-10
Supplement: Supplementary file 1 [file supplementary]

## Sheet: Table S1
Table S1: Supplementary table
#	Article	Abstract	Bats' species or family	Bats' food habit	Bats' country		Sample type	Culture plate	Bacterial isolates	AST	Antibiotic resistance rates	Resistance genes
1	Graves SR, Kennelly-Merrit SA, Tidemann CR, Rawlinson PA, Harvey KJ, Thornton IW. Antibiotic-resistance patterns of enteric bacteria of wild mammals on the Krakatau islands and west Java, Indonesia. Philos Trans R Soc Lond B Biol Sci. 1988 Dec 19;322(1211):339-53. doi: 10.1098/rstb.1988.0129. PMID: 2907654.	Apart from feral pigs on Panjang, rats (Rattus rattus and Rattus tiomanicus) and bats (various families, genera and species) are the only mammals resident on the Krakatau Islands. The two species of rat occur on separate islands, R. rattus on Rakata and R. tiomanicus on Panjang and Sertung. Both occur on Java. Of the two genera of bats examined, species of Cynopterus were found on Java and all th…	Cynopterus spp., including C. brachyotis javanicus, C. sphinx angulatus, and C. tittaecheilus tittaecheilus	Frugivorous	Indonesia	1985	Fecal (rectal swab)	MacConkey agar	Cynopterus spp.: Enterobacter (20 isolates from 10 bats), E. coli (14 isolates from 8 or 9 bats); Klebsiella (10 isolates from 6 bats), Citrobacter (≥4 isolates from 4 bats), Pseudomonas (≥3 isolates from 3 bats), Serratia (≥2 isolates from 2 bats), unidentified Gram-negative rod (1 isolate), unidentified Gram-positive rod (1 isolate), and Staphylococcus sp. coagulase-negative (1 isolate)	Replica plate method (ampicillin 8 μg/ml, chloramphenicol 8 μg/ml, sulfamethoxazole 20 μg/ml, trimethoprim 1 μg/ml, gentamicin 4 μg/ml, cephalothin 8 μg/ml, or tetracycline 4 μg/ml)	Enterobacter (24 isolates): Cephalothin (96%), ampicillin (67%), tetracycline (50%, trimethoprim (17%), sulphamethoxazole (8%), chloramphenicol (8%), and gentamicin (4%).	Not detected
			Myotis muricola muricola	Insectivorous							Klebsiella (11 isolates): Ampicillin (82%), sulphamethoxazole (27%), and cephalothin (18%).
									Myotis muricola muricola: Enterobacter (4 isolates from 3 bats), Proteus/Providencia (≥2 isolates from 2 bats), Morganella (≥2 isolates from 2 bats), E. coli (1 isolate), Klebsiella (1 isolate), Citrobacter (1 isolate), Serratia (1 isolate), and Streptococcus faecalis (≥2 isolates from 2 bats)		E. coli (15 isolates): Sulphamethoxazole (27%), cephalothin (20%), and trimethoprim (7%).
											Citrobacter (≥5 isolates): Cephalothin (100%) and ampicillin (80% of the Cynopterus isolates)
2	Souza V, Rocha M, Valera A, Eguiarte LE. Genetic structure of natural populations of Escherichia coli in wild hosts on different continents. Appl Environ Microbiol. 1999 Aug;65(8):3373-85. doi: 10.1128/AEM.65.8.3373-3385.1999. PMID: 10427022; PMCID: PMC91507.	Current knowledge of genotypic and phenotypic diversity in the species Escherichia coli is based almost entirely on strains recovered from humans or zoo animals. In this study, we analyzed a collection of 202 strains obtained from 81 mammalian species representing 39 families and 14 orders in Australia and the Americas, as well as several reference strains; we also included a strain from a reptil…	Tadarida brasiliensis	Insectivorous	Mexico	Not available	Fecal	A minimal lactose agar / MacConkey agar	E. coli (11 isolates): Tadarida brasiliensis (n=3), Desmodus rotundus (n=2), Leptonycteris nivalis (n=3), and Carollia brevicauda (n=3)	Replica plate method (ampicillin 50 μg/ml, chloramphenicol 12 μg/ml, kanamycin 50 μg/ml, neomycin 50 μg/ml, streptomycin 50 μg/ml, and tetracycline 25 μg/ml)	E. coli (11 isolates): Streptomycin (100%), ampicillin (46%), and neomycin (15%); none of the isolates were resistant to chloramphenicol, kanamycin, or tetracycline	Not detected
			Desmodus rotundus	Sanguivorous
			Leptonycteris nivalis	Nectarivorous
			Carollia brevicauda	Nectarivorous
3	Apun K, Chong YL, Abdullah MT, Micky V. Antimicrobial susceptibilities of Escherichia coli isolates from food animals and wildlife animals in Sarawak, East Malaysia. Asian Journal of Animal and Veterinary Advances 2008. 3(6): 409-416. doi: 10.3923/ajava.2008.409.416 https://scholar.google.com/scholar?hl=en&as_sdt=0%2C5&q=Antimicrobial+Susceptibilities+of+Escherichia+coli+Isolates+from+Food+Animal…	A total of 133 E. coli strains isolated from different food animals and wildlife sources in Sarawak, Malaysia were screened to determine their antibiotic-resistance pattern using the disk diffusion methods. The animal sources were broiler and village chickens, cattle, bats and rodents. All E. coli isolates were tested for their resistance patterns towards 12 commonly used antibiotics: ampicillin,…	Not available	Not available	Malaysia	2004-2005	Fecal and anal wabs	Eosin Methylene Blue agar and MacConkey agar	E. coli (13 isolates)	Agar disk diffusion (ampicillin, carbenicillin, cephalothin, chloramphenicol, gentamicin, nalidixic acid, neomycin, nitrofurantoin, ofloxacin, streptomycin, sulfamethoxazole-trimethoprim, and tetracycline)	E. coli (13 isolates): Carbenicillin (7.7%) and streptomycin (7.7%); none of the isolates were resistant to ampicillin, cephalothin, chloramphenicol, gentamicin, nalidixic acid, neomycin, nitrofurantoin, ofloxacin, sulfamethoxazole-trimethoprim, or tetracycline	Not detected
4	Walther, B., Wieler, L. H., Friedrich, A. W., Hanssen, A. M., Kohn, B., Brunnberg, L., & Lübke-Becker, A. (2008). Methicillin-resistant Staphylococcus aureus (MRSA) isolated from small and exotic animals at a university hospital during routine microbiological examinations. Veterinary Microbiology, 127(1-2), 171-178. doi:10.1016/j.vetmic.2007.07.018	Clinical specimens of small animals (n = 869) were screened for the occurrence of methicillin-sensitive and methicillinresistant Staphylococcus aureus (MSSA; MRSA) during routine microbiological examinations, and results were confirmed by a multiplex PCR strategy. The genetic relatedness of all mecA-positive S. aureus isolates was further investigated by pulsed-field gel electrophoresis (PFGE), m…	Not mentioned	Not mentioned	Germany	2003-2004	Wounds sample	Standard nutrient agar I with 5% defibrinated sheep blood, Chrom agar orientation and Gassner agar	Methicillin resistant S. aurues (MRSA)=1	Not mentioned	Not mentioned	Not detected
5	Adesiyun AA, Stewart-Johnson A, Thompson NN. Isolation of enteric pathogens from bats in Trinidad. J Wildl Dis. 2009 Oct;45(4):952-61. doi: 10.7589/0090-3558-45.4.952. PMID: 19901371.	Bats are one of the most widely distributed mammals in the world, and they are reservoirs or carriers of several zoonoses. Bats were trapped in 27 geographic locations across Trinidad and Tobago, and following euthanasia, gastrointestinal tracts were aseptically removed. Contents were subjected to bacteriologic analysis to detect Salmonella spp., Escherichia coli, and Campylobacter spp. Isolates …	Artebius sp. , Carollia perspicillata	Frugivorous	Trinidad	2006-2007	Intestines or fecal contents	Eosin Methylene Blue agar, Blood agar, xylose-lysine-desoxycholate, brilliant green agar, MacConkey agar, and Campylobacter blood-free agar containing charcoal cefoperazone deoxycholate	E. coli (49 isolates): Artebius sp. (n=15), Carollia perspicillata (n=1), Desmodus rotundus (n=2), Diaemus youngi (n=2), Glossophaga sp. (n=3), Molossus major (n=2), Mormoops sp. (n=3), Noctilio leporinus (n=2), Phyllostomus hastatus (n=6), Phyllostomus discolor (n=4), Pteronotus parnelli (n=7), Unknown (n=2)	Agar disc diffusion (amoxicillin, sulfamethoxazole/trimethoprim., erythromycin, kanamycin , nalidixic acid, gentamycin, streptomycin, and tetracycline)	E. coli (49 isolates): erythromycin (71.4%), streptomycin (26.5%), tetracycline (16.3%, 8/49), amoxicillin (6.1%), kanamycin (6.1%), nalidixic acid (4%), sulphamethoxazole/trimethoprim (2%); none of the isolates were resistant to gentamycin	Not detected
			Glossophaga sp.	Nectarivorous
			Molossus major, M. ater, Mormoops sp., Pteronotus parnelli	Insectivorous
			Noctilio leporinus	Fish					Salmonella spp. (4 isolates): Molossus major (n=1), M. ater (n=1), Noctilio leporinus (n=2)		Salmonella spp (4 isolates).: Streptomycin (100%), erythromycin (75%)
			Phyllostomus hastatus, P. discolor	Omnivorous
			Desmodus rotundu, Diaemus youngi	Sanguivorous
			Unknown
6	Oluduro AO. Antibiotic-resistant commensal Escherichia coli in faecal droplets from bats and poultry in Nigeria. Vet Ital. 2012 Jul-Sep;48(3):297-308. PMID: 23038076.	The prevalence of antibiotic resistance and plasmid carriage among commensal faecal Escherichia coli isolates of bats, broilers and free-range chickens in Ile-Ife, Osun State, Nigeria was studied. A total of 125 E. coli isolates were recovered from the fresh faecal samples of bats, broilers and free-range chickens on eosin methylene blue agar plates and characterised using standard biochemical te…	Not available	Not available	Nigeria	Not available	Faecal	Eosin Methylene Blue agar	E. coli (50 isolates)	Agar disc diffusion (amoxicillin, augmentin, ceftriaxone, gentamicin, ciprofloxacin, ofloxacin, pefloxacin, sulfamethoxazole/trimethoprim, nitrofurantoin, and tetracycline)	E. coli (50 isolates): Augmentin (92%), amoxicillin (82%), nitrofurantoin (54%), sulfamethoxazole-trimethoprim (40%), ceftriaxone (30%), tetracycline (30%), gentamicin (22%), ciprofloxacin (2%), ofloxacin (2%), and pefloxacin (2%)	Not detected
7	Islam, A., Mikolon, A., Mikoleit, M., Ahmed, D., Khan, S. U., Sharker, M. A., . . . Luby, S. P. (2013). Isolation of Salmonella Virchow from a fruit bat (Pteropus giganteus). Ecohealth, 10(4), 348-351. doi:10.1007/s10393-013-0866-y	Detection of zoonotic pathogens carried by bats is important both for understanding disease ecology and for developing preventive measures. Pteropus fruit bats have been identified as potential carriers of Salmonella enterica serotype Typhi. A cross-sectional study was conducted to determine the prevalence of Salmonella Typhi and other Salmonella serotypes in Pteropus giganteus fruit bats in Bang…	Pteropus giganteus	Frugivorous	Bangladesh	2010	Rectal Swab	MacConkey agar, S–S agar	Salmonella serotype Virchow =1	MIC (amikacin, amoxycillin/clavulanic acid, ampicillin, cefoxitin, ceftiofur, ceftriaxone, chloramphenicol, ciprofloxacin, gentamycin, kanamycin, nalidixic acid, streptomycin, sulfisoxazole, tetracycline, and trimethoprim/ sulphamethoxazole)	All sensitive	Not detected
8	de Jong, C. E., Jonsson, N., Field, H., Smith, C., Crichton, E. G., Phillips, N., & Johnston, S. D. (2005). Collection, seminal characteristics and chilled storage of spermatozoa from three species of free-range flying fox (Pteropus spp.). Theriogenology, 64(5), 1072-1089. doi:https://doi.org/10.1016/j.theriogenology.2005.02.016	This study reports observations on the collection and characteristics of semen from free-range populations of flying fox in Brisbane, Australia. Semen was successfully recovered by electroejaculation from 107 of 115 wild flying foxes (Pteropus alecto, Pteropus poliocephalus and Pteropus scapulatus). A proportion of ejaculates collected from all three species contained seminal vesicle secretions, …	Pteropus alecto P. poliocephalus P. scapulatus	Frugivorous	Australia	2001-2002	Semen, urethral and preputial swabs	7% sheep blood agar (SBA), MacConkey agar and Sabouraud Dextrose (SC) agar with chloramphenicol	As well as Streptococcus spp., a further six bacterial genera were shared by at least two bat species including coagulase-negative Staphylococcus spp., S. aureus, Acinetobacter spp., Enterobacter gergoviae, Enterobacter spp. and Moraxella spp	tetracycline , trimethoprim/sulphamethoxazole, enrofloxacin, gentamicin, amoxyclavulanic acid, and cephalothin Gram-positive bacteria: penicillin, erythromycin, and clindamycin Gram-negative bacteria: ampicillin, ceftazidime, ciprofloxacin, timentin	All bacteria were sensitive to tetracycline. All other broad-spectrum antibiotics were ineffective in preventing microbial growth of at least one bacterial genus. The most effective antibiotic targeting Gram-positive bacteria was penicillin, while ceftazidime and ciprofloxacin were most effective in controlling the growth of Gram-negative bacteria.	Not detected
9	Akobi B, Aboderin O, Sasaki T, Shittu A. Characterization of Staphylococcus aureus isolates from faecal samples of the Straw-Coloured Fruit Bat (Eidolon helvum) in Obafemi Awolowo University (OAU), Nigeria. BMC Microbiol. 2012 Nov 26;12:279. doi: 10.1186/1471-2180-12-279. PMID: 23181939; PMCID: PMC3554579.	Background: Bats (Chiroptera) are one of the most diverse groups of mammals which carry out important ecological and agricultural functions that are beneficial to humans. However, they are increasingly recognized as natural vectors for a number of zoonotic pathogens and favourable hosts for zoonotic infections. Large populations of the Straw-Coloured Fruit Bat (Eidolon helvum) colonize the main c…	Eidolon helvum	Frugivorous	Nigeria	2008-2010	Fecal Samples	mannitol salt agar (MSA)	Staphylococcus aureus (107 isolates)	Disc diffusion (Penicillin, Oxacillin, Cefoxitin Erythromycin, Clindamycin, Tetracycline, Ciprofloxacin, Chloramphenicol, Fusidic Acid, Gentamicin, Mupircin)	Staphylococcus aureus (107 isolates: Penicillin (3.7%), Erythromycin (7.5%), Clindamycin (3.7%), Ciprofloxacin (5.6%), Fusidic Acid (2.8%),	Not detected
10	Vandžurová A, Bačkor P, Javorský P, Pristaš P. Staphylococcus nepalensis in the guano of bats (Mammalia). Vet Microbiol. 2013 May 31;164(1-2):116-21. doi: 10.1016/j.vetmic.2013.01.043. Epub 2013 Feb 8. PMID: 23462520.	Thirty randomly selected mesophilic isolates from the six years old guano sample from mixed Myotis myotis and M. blythii summer roosts colony were isolated and identified as Staphylococcus nepalensis using MALDI TOF analysis. 16S rRNA gene sequencing of selected five isolates and subsequent phylogenetic analysis confirmed that all sequences showed the highest similarity to S. nepalensis sequences…	Myotis myotis and M. blythii	Insectivorous	Slovakia	2010	Guano sample	Nutrient agar	Staphylococcus nepalensis (5 isolates)	Disc diffusion (ampicillin erythromycin, tetracycline, kanamycin, chloramphenicol, neomycin, streptomycin, gentamycin, vancomycin, sulfamethyazol, methilicin/oxacilin, teicoplanin, mupirocin quinupristin/dalfopristin)	Staphylococcus nepalensis (5 isolates): Erythromycin (100%), Tetracycline (80%), Chloramphenicol (60%), Gentamycin (40%),
11	Obi T, Chibana M, Taira C, Nakayama A, Miyazaki K, Takase K, Nakamura I, Miyamoto A, Kawamoto Y. Antimicrobial susceptibility in Enterobacteriaceae recovered from Okinawa least horseshoe bat Rhinolophus pumilus. Wildlife Biol. 2014;20(1):64-66. doi: 10.2981/wlb.13067. https://scholar.google.com/scholar?hl=en&as_sdt=0%2C5&q=Antimicrobial+Susceptibility+in+Enterobacteriaceae+Recovered+from+Okinawa+…	Susceptibility to antimicrobial agents among Enterobacteriaceae recovered from feces of the Okinawa least horseshoe bat Rhinolophus pumilus (OLHB) in Japan was investigated in 78 isolates. Of these, one isolate was resistant to chlortetracycline and streptomycin, and nine were resistant to sulfadimethoxine (SDMX). Half of these (n = 5) resistant isolates had the transmissible R plasmid for antimi…	Rhinolophus pumilus	Insectivorous	Japan	Not available	Fecal	MacConkey agar	E. coli (26 isolates) K. pneumoniae (38 isolates) Citrobacter freundii (14 isolates)	Agar dilution method (chloramphenicol, ampicillin, chlortetracycline, kanamycin, nalidixic acid, streptomycin, and sulfadimethoxine)	E. coli (26 isolates): Chlortetracycline (3.8%) and streptomycin (3.8%)	Not Detected
											K. pneumoniae (38 isolates): Sulfadimethoxin (13%)
											C. freundii (14 isolates): Sulfadimethoxin (28.5%)
12	Iovine Rde O, Dejuste C, Miranda F, Filoni C, Bueno MG, de Carvalho VM. Isolation of Escherichia coli and Salmonella spp. from free-ranging wild animals. Braz J Microbiol. 2015 Oct-Dec;46(4):1257-63. doi: 10.1590/S1517-838246420140843. Epub 2015 Oct 27. PMID: 26691488; PMCID: PMC4704624.	Increasing interactions between humans, domestic animals and wildlife may result in inter-species transmission of infectious agents. To evaluate the presence of pathogenic E. coli and Salmonella spp. and to test the antimicrobial susceptibility of isolates, rectal swabs from 36 different free-ranging wild mammals were taken from two distinct natural sites in Brazil: Cantareira State Park (CSP, st…	Molossus molossus	Insectivorous	Brazil	Not available	Fecal (rectal swab)	MacConkey Agar. A previously published protocol (Michael et al., 2003) was used to isolate Salmonella spp.	E. coli (17 isolates)	Agar disc diffusion (amoxicillin, ampicillin, cephalexin, cefoxitin, ceftiofur, ciprofloxacin, enrofloxacin, chloramphenicol, sulfamethoxazole-trimethoprim, streptomycin, gentamicin, and tetracycline)	E. coli (17 isolates): Ampicillin (59%, 10/17) and amoxicillin (35%)	Not detected
			Glossophaga soricina	Nectarivorous
			Desmodontinae sp.	Sangivorous
			Mesophylla macconnelli	Frugivorous
			Lophostoma sp.
			Tonatia saurophila
13	Nowak K, Fahr J, Weber N, Lübke-Becker A, Semmler T, Weiss S, Mombouli JV, Wieler LH, Guenther S, Leendertz FH, Ewers C. Highly diverse and antimicrobial susceptible Escherichia coli display a naïve bacterial population in fruit bats from the Republic of Congo. PLoS One. 2017 Jul 12;12(7):e0178146. doi: 10.1371/journal.pone.0178146. PMID: 28700648; PMCID: PMC5507484.	Bats are suspected to be a reservoir of several bacterial and viral pathogens relevant to animal and human health, but studies on Escherichia coli in these animals are sparse. We investigated the presence of E. coli in tissue samples (liver, lung and intestines) collected from 50 fruit bats of five different species (Eidolon helvum, Epomops franqueti, Hypsignathus monstrosus, Myonycteris torquata…	Eidolon helvum Epomops franqueti Hypsignathus monstrosus Myonycteris torquata Rousettus aegyptiacus	Frugivorous	Republic of Congo	2009-2010	intestines (with fecal content) (n liver, lung), and kidney	Columbia blood agar (5% blood), Gassner agar and Chrom orientation agar	E. coli (49 isolate)s	Disc Diffusion: Only 40 istrain was further checked for AST (amoxicillin/clavulanic acid, ampicillin, cephalosporins, cefovecin, cephalexin, cefazolin, chloramphenicol, cotrimoxazole, doxicycline, enrofloxacin,, gentamicin , marbofloxacin and tetracycline)	E. coli (49 isolates): intermediate resistance: Doxicycline (89%), Cefalexin (28%), Cefovecin (20.5%)	Not detected
14	Afiukwa Ngozi, Nwuzo Agabus, Okonkwo Eucharia, Udu-Ibiam Onyinyechi, Emioye Abraham, Chika, Ejikeugwu, & Ifeanyichukwu1, Iroha. (2018). A three-year study on the prevalence and antibiotic susceptibility pattern of Escherichia coli isolated from cloacal swabs of wild and domestic birds in Ebonyi State, Nigeria. EC Microbiology, 14(5), 266-273.	Antibiotic resistance is a natural biological phenomenon that is vital to microbial colonization and survival in the environment. But this process is of clinical significance because of the ability of antibiotic resistant bacteria to render inefficacious some available antimicrobial agents. This study evaluated the prevalence and antibiotic susceptibility pattern of Escherichia coli isolates from…	Not mentioned	Not mentioned	Nigeria	2012-2014	Cloacal Swabs	MacConkey (MAC) and Eosin Methylene Blue (EMB) agar	E. coli: 9 isolates (2012) E. coli: 6 isolates (2013)	Ceftriaxone, Ceftazidime, Cefotaxime, Cefoxitin, Cefuroxime, Imipenem, Meropenem , ertapenem, Aztreonam	E. coli (9 isolates) 2012: Ceftriaxone (33.33%), Ceftazdime (77.78%), aztreonam, (44.44%), cefuroxime (88.89%), cefotaxime (100%), cefoxitin (33.33%), Imipenem (22.22%), Meropenem (22.22%), Ertepenem (22.22%) E. coli (6 isolates) 2013: Ceftriaxone (66.67%), Ceftazdime (83.38%), aztreonam (83.38%), cefuroxime (100%), cefotaxime (100%), cefoxitin (66.67%), Imipenem (0%), Meropenem (66.67%), Ertepen…	Not detected
15	Olatimehin A, Shittu AO, Onwugamba FC, Mellmann A, Becker K, Schaumburg F. Staphylococcus aureus complex in the straw-colored fruit bat (Eidolon helvum) in Nigeria. Front Microbiol. 2018 Feb 13;9:162. doi: 10.3389/fmicb.2018.00162. PMID: 29487577; PMCID: PMC5816944.	Bats are economically important animals and serve as food sources in some African regions. They can be colonized with the Staphylococcus aureus complex, which includes Staphylococcus schweitzeri and Staphylococcus argenteus. Fecal carriage of S. aureus complex in the straw-colored fruit bat (Eidolon helvum) has been described. However, data on their transmission and adaptation in animals and huma…	Eidolon helvum	Frugivorous	Nigeria	2015-2016	Fecal Sample	mannitol salt agar (MSA)	S. aureus (28 isolates) S. schweitzeri (11 isolates) S. argenteus (14 isolates)	Vitek2 automated system ( Penicllin, Tetracycline, oxacillin, levofloxacin, glycopeptides, daptomycin, fosfomycin, linezolid, erythromycin, clindamycin, gentamycin, rifampicin, and trimethoprim/sulfamethoxazole)	penicillin (1.88%), tetracyclie (1.88%)	Not detected
16	Benavides JA, Shiva C, Virhuez M, Tello C, Appelgren A, Vendrell J, Solassol J, Godreuil S, Streicker DG. Extended-spectrum beta-lactamase-producing Escherichia coli in common vampire bats Desmodus rotundus and livestock in Peru. Zoonoses Public Health. 2018 Jun;65(4):454-458. doi: 10.1111/zph.12456. Epub 2018 Mar 25. PMID: 29575785; PMCID: PMC6446800.	Antibiotic resistance mediated by bacterial production of extended-spectrum beta-lactamase (ESBL) is a global threat to public health. ESBL resistance is most commonly hospital-acquired; however, infections acquired outside of hospital settings have raised concerns over the role of livestock and wildlife in the zoonotic spread of ESBL-producing bacteria. Only limited data are available on the cir…	Desmodus rotundus	Sanguivorous	Peru	2015	Fecal sample	ChromID ESBL	E. coli (5 isolates)	Disc diffusion (Amoxicllin, Amoxicillin/clavulanic acid, amikacin, aztreonam, cefotaxime, cefoxitin, Ceftazdime, Chloramphenicol, Doxicycline, Fosfomycin, Gentamicin, Ertepenem, Imipenem, Nalidixic acid, Netilmicin, levofloxacin, Ciprofloxacin, Ofloxacin Piperacillin, Piperacillin/tazobactam, Tetracycline, Ticarcillin, Ticarcillin/clavulanic acid, Tobramycin)	Amoxicillin (100%), Amoxicillin + Clavulanic (100%), Ticarcillin (100%), Ticarcillin+ Clavulanic (100%), Piperacillin (100%), Cefotaxime (100%), Ceftazidime (60%, 3/5), Cefepime (100%), Aztreonam (60%), Gentamicin (60%), Tobramycin (60%), Netillmicin (60%), Amilkacin (0%), Chloramphenicol (100%), Tetracyclines (100%), Trimethoprim + Sulfamethoxazole (100%), Nalidixic Acid (60%), Ofloxacin (60%), …	bla-CTXM-15 (100%)
17	Cláudio VC, Gonzalez I, Barbosa G, Rocha V, Moratelli R, Rassy F. Bacteria richness and antibiotic-resistance in bats from a protected area in the Atlantic Forest of Southeastern Brazil. PLoS One. 2018 Sep 14;13(9):e0203411. doi: 10.1371/journal.pone.0203411. PMID: 30216351; PMCID: PMC6138367.C36:C40	Bats play key ecological roles, also hosting many zoonotic pathogens. Neotropical bat microbiota is still poorly known. We speculate that their dietary habits strongly influence their microbiota richness and antibiotic-resistance patterns, which represent growing and serious public health and environmental issue. Here we describe the aerobic microbiota richness of bats from an Atlantic Forest rem…	Carollia perspicillata, Artibeus lituratus A. fimbriatus. A. obscurus, Dermanura cinerea, Pygoderma bilabiatum, Sturnira tildae S. lilium, Platyrrhinus lineatus P. recifinus	Frugivorous	Brazil	2016-2017	Oral and Rectal Sample	5% sheep blood agar and MacConkey agar,	A. baumannii (1 isolate) P. aeruginosa (2 isolates) E. coli (20 isolates) K. oxytoca (13 isolates) Salmonella sp., (2 isolates) Serratia marcescens (36 isolates) Stenotrophomonas (5 isolates) S. maltophilia (2 isolates)	Disc Diffusion: A. baumannii: Amikacin, ceftazidime, ceftriaxone, ciprofloxacin, chloramphenicol, Gentamicin, imipenem, norfloxacin P. aeruginosa: Ceftazidime, ceftriaxone ciprofloxacin, gentamicin imipenem, norfloxacin E. coli. K oxytoca, Salmonella, S. marcesences: Amikacin, ceftazidime, ceftriaxone, ciprofloxacin, chloramphenicol, gentamicin Imipenem, doxycycline , ampicillin, amoxicillin-clav…	E. coli (20 isolates) : Ampicillin (20%), Amoxicillin-clavulanate (10%), cephalexin (15%) A. baumanii (1 isolate): Ciprofloxacin (100%), K oxytoca (13 isolates) : ampicillin (61.5%), amoxicillin-clavulanate (7.6%), cephalexin (7.6%) . Salmonella spp: ampicillin (50%), cephalexin (50%). S. marcesences: ampicillin (94%), amoxicillin-clavulanate (97%), cephalexin (100%) Stenotrophomonas spp: Ceftazi…	Not detected
			Molossus rufus, M. molossus, M. cf. currentium , Molossops neglectus Lasiurus ebenus, Eptesicus taddeii, Glyphonycteris sylvestris, Histiotus velatu,s Micronycteris microtis, Myotis nigricans M. riparius	Insectivorous
			Trachops cirrhosis, Mimon bennetti	Carnivorous
			Anoura geoffroyi, A. caudifer	Nectarivorous
			Desmodus rotundus Diphylla ecaudata	Sangivorous
18	Sens-Junior, Helio, Trindade, Wesley A, Oliveira, Aliny F, Zaniolo, Melissa M, Serenini, Grazielli F, Araujo-Ceranto, Jacqueline B, . . . Germano, Ricardo M %J Pesquisa Veterinária Brasileira. (2018). Bacterial resistance in bats from the Phyllostomidae family and its relationship with unique health. 38(6), 1207-1216.	The Phyllostomidae family is important among the bats found in Brazil, with several species and diverse eating habits, and is the only one to have frugivorous representatives. These bats can be found in urban and in wild life environments in search for the best reproductive and feeding conditions. The versatility of environments can be associated with the incidence and/or distribution of some dis…	Carollia perspicillata Sturnira lillium Artibeus lituratus Artibeus planirostris	Frugivorous	Brazil		perianal region and oral region	MacConkey agar	E. coli (35 Iisolates) Enterobacter agglomerans (9 isolates) Serratila liquefaciens (8 isolates)	Disc diffusion (Amoxicillin, Amoxicillin/clavulanic acid, amikacin, Ampicillin, aztreonam, cefotaxime, cefepime, cefotaxitin, Ceftazdime, Ceftriaxone ceftiofu, Chloramphenicol, enrofloxacin,, Gentamicin , Meropenem, Ertepenem, Imipenem, Nalidixic acid, Ciprofloxacin, Sulfazotrim, Tetracycline, Tobramycin)	E. coli (35 isolates): Amoxicillin (57.1%), Amoxicillin/clavulanic acid (11.4%), Ampicillin (54%), aztreonam (8.5%), cefotaxime (5.7%), cefotaxitine (11.42%), enrofloxacin (5.7%), Imipenem (2.85%), Ertepenem (2.85%), Gentamicin (2.85%), Nalidixic acid (5.7%), Tetracycline (14.2%), Sulfazotrim (2.85%). E. aerogenes (11 isolates): Amoxicillin (91%), Amoxicillin/clavulanic acid (64% ), Ampicillin (8…	Not detected
19	Garcês A, Correia S, Amorim F, Pereira JE, Igrejas G, Poeta P. First report on extended-spectrum beta-lactamase (ESBL) producing Escherichia coli from European free-tailed bats (Tadarida teniotis) in Portugal: A one-health approach of a hidden contamination problem. J Hazard Mater. 2019 May 15;370:219-224. doi: 10.1016/j.jhazmat.2017.12.053. Epub 2017 Dec 23. PMID: 29290482.	The main aim of this study was to characterize the diversity of extended-spectrum beta-lactamases (ESBLs) in Escherichia coli isolates from European free tailed-bats (Tadarida teniotis) in Portugal. ESBL-producing E. coli isolates were recovered from 14 of 146 faecal samples (9.6%) and a total of 19 isolates were completely characterized. The more prevalent beta-lactamase genes detected were blaC…	Tadarida teniotis	Insectivorous	Portugal	2014-2016	guano pellets	Levine agar plates supplemented with cefotaxime (2 mg/mL)	E. coli (19 isolates)	Disc Diffusion (Ampicillin, Amoxicillin-clavulanic acid, Cefoxitin, Cefotaxime, Ceftazdime, Aztreonam, imipenem, Gentamicin, Amikacin, Tobramycin, Streptomycin, Nalidixic acid, Ciprofloxacin, Sulfamethoxazole-trimethoprim, Tetracycline, Chloramphenicol)	E. coli (19 isolates): Amoxicillin (11%), Amikacin (5%), Ampicillin (37%), Cefotaxime (100%), Nalidixic acid (5%) , Streptomycin (5%), Tetracycline (47%), Sulfamethoxazole-trimethoprim (5%)	blaCTX-M-1(57.9%), blaCTX-M-3(36.8%), blaSHV(31.6%), blaTEM(21.1%), blaOXA(10.5%), blaCTX-M-9(10.5%), tet(A) (15.7%), tet(B)(15.7%), aadA (5%)
20	Garcês, Andreia, Correia, Susana, Silva, Vanessa, Pereira, José Eduardo, Amorim, Francisco, Igrejas, Gilberto, & Poeta, Patricia. (2019). Detection of antimicrobial resistance in faecal Escherichia coli from European free-tailed bats (Tadarida teniotis) in Portugal. J Acta Chiropterologica(2), 403-409, 407.	In the last decades, the increase of antimicrobial resistance bacteria has become a concern of public health, already affecting unintentional hosts as isolated wild populations. In the present study, we evaluated the incidence of antimicrobial resistance, molecular mechanisms of resistance and virulence genes among 42 strains of Escherichia coli isolated from faecal samples from wild colonies of …	Tadarida teniotis	insectivorous	Portugal	2014-2016	Guano samples	Levine agar	E. coli isolates (42 isolates)	Amoxicillin, amikacin, Ampicillin, aztreonam, Cefotaxime, Ceftazdime, Trimethoprim-sulfamethoxazole, Gentamicin , Nalidixic acid, Ciprofloxacin, Streptomycin, Tetracycline, Tobramycin	E. coli (42 isolates): Amoxicllin (7.1%), Ampicillin (57.1%), Ceftazdime (2.4%), Amikacin (7.1%), Ciprofloxacin (4.8%), Nlidixic acid (7.1%), tetracylcine (14.3%), Trimethoprim-sulfamethoxazole (9.5%), Streptomycin (52.4%), Tobramycin (7.1%), Aztreonam(2.4%), Cefotaxime (16.7%), gentamicin (2.4%)	blaTEM (4.8%), blaSHv (4.8%), blaOXA (21.4%) blaOXA+ blaSHV (7.1%), aadA (2.4%), strA (2.4%), strB (2.4%), strB+ aadA (7.1%), strA+ aadA (7.1%), tetA (2.4%), tetB (7.1%), sul2 (4.8%), sul+sul2 (2.4%)
21	Hassell JM, Ward MJ, Muloi D, Bettridge JM, Robinson TP, Kariuki S, Ogendo A, Kiiru J, Imboma T, Kang'ethe EK, Öghren EM, Williams NJ, Begon M, Woolhouse MEJ, Fèvre EM. Clinically relevant antimicrobial resistance at the wildlife-livestock-human interface in Nairobi: an epidemiological study. Lancet Planet Health. 2019 Jun;3(6):e259-e269. doi: 10.1016/S2542-5196(19)30083-X. Erratum in: Lancet Pla…	Background Antimicrobial resistance is one of the great challenges facing global health security in the modern era. Wildlife, particularly those that use urban environments, are an important but understudied component of epidemiology of antimicrobial resistance. We investigated antimicrobial resistance overlap between sympatric wildlife, humans, livestock, and their shared environment across the …	Eidolon spp.	Frugivorous	Kenya	2015-2016	Fecal sample	Eosin Methylene Blue agar	E. coli (28 isolates)	Disc Diffusion (Amoxicillin, Ampicillin, cefotaxime, cefepime, Ceftazdime, Chloramphenicol, Trimethoprim, Gentamicin , Nalidixic acid, Ciprofloxacin, Streptomycin, Sulphonamide, Tetracycline)	E. coli (28 isolates) : Ampicillin (35.62 %), Chloramphenicol (6.9%), Ceftazidime (0%), Cefepime (0%), Nalidixic (7.19%), Tetracycline (21.43%), Sulphonamide (82%) Streptomycin (46.58%), Trimethoprim (31.94%), Ciprofloxacin (7.14%), Cefotaxime (10.82%), Gentamicin (14.13%)	Not detected
			Epomorphus spp.
			Rousettus spp.
			Minioptera spp.	Insectivorous
			Neoromicia spp
			Pipistrellus spp.
			Scotophilus spp.
22	McDougall F, Boardman W, Gillings M, Power M. Bats as reservoirs of antibiotic resistance determinants: A survey of class 1 integrons in Grey-headed Flying Foxes (Pteropus poliocephalus). Infect Genet Evol. 2019 Jun;70:107-113. doi: 10.1016/j.meegid.2019.02.022. Epub 2019 Feb 21. PMID: 30798035.	Increasing reports of antimicrobial resistance in wildlife highlight the significance of a One Health approach to managing resistance. We investigated the prevalence and diversity of class 1 integrons, a genetic determinant of resistance, in grey-headed flying foxes, a large fruit bat species belonging to the order Chiroptera. Class 1 integrons were detected in both wild flying foxes (5.3%) and c…	Pteropus poliocephalus	Frugivorous	Australia	2017	fecal sample	Not available	Not available	Not available	Not available	(37.1%) fecal samples were intI1 positive (12/76 wild and 54/102 captive). wild flying fox were positive for aacA34, aadA2, blaOXA-21, dfrA5, qacF and qacH captive flying fox samples postive for aadA1, aadA2, blaOXA-2, blaOXA-21, dfrA1, dfrA5, and dfrA21
23	Gharout-Sait A, Touati A, Ahmim M, Brasme L, Guillard T, Agsous A, de Champs C. Occurrence of Carbapenemase-Producing Klebsiella pneumoniae in Bat Guano. Microb Drug Resist. 2019 Sep;25(7):1057-1062. doi: 10.1089/mdr.2018.0471. Epub 2019 Apr 25. PMID: 31021173.	The aim of this study was to screen for the presence of carbapenemase-producing Enterobacteriaceae (CPE) isolates from bat guano in Bejaia, Algeria. Guano samples (n = 110) were collected in Aokas's cave, Bejaia, Algeria, between March and May 2016. Samples were plated on MacConkey agar supplemented with ertapenem (0.5 mg/L) and vancomycin (32 mg/L). The isolates were identified and antimicrobial…	Not available	Not available	Algeria	2016	Guano	MacConkey agar plates containing ertepenem (0.5 mg/L) and vancomycin (32mg/mL)	K. pneumoniae (2 isolate)	Disc diffusion ( amoxicillin-clavulanic acid ticarcillin , ticarcillin-clavulanic acid, piperacillin, piperacillin-tazobactam, cefotaxime, cefotaxime-clavulanic acid, ceftazidime, ceftazidime-clavulanic acid, cefoxitin, aztreonam, cefepime, cefepime-clavulanic acid, cefpirome, imipenem, ertapenem, temocillin , tobramycin, amikacin , nalidixic acid, norfloxacin , ciprofloxacin, ofloxacin , tetracy…	K. pneumoniae (2 isolate) : amoxicillin-clavulanic acid (100%), ticarcillin (100%) ticarcillin-clavulanic acid (100%), piperacillin-tazobactam (50%), cefotaxime(50%), cefotaxime-clavulanic acid (50%), ceftazidime (50%), ceftazidime-clavulanic acid (50%), cefoxitin (100%) aztreonam (50%), cefepime (50%), cefepime-clavulanic acid (50%), cefpirome (50%), imipenem (50%) ertapenem (100%), temocillin (…	blaOXA-48 (50%), blaKPC-3 (50%), blaTEM-1 (50%) and aac(6¢)-Ib (50%)
24	Fountain K, Roberts L, Young V, Barbon A, Frosini SM, Lloyd DH, Loeffler A. Diversity of Staphylococcal species cultured from captive livingstone's fruit bats (Pteropus Llivingstonii) and their environment. J Zoo Wildl Med. 2019 Mar 1;50(1):266-269. doi: 10.1638/2018-0121. PMID: 31120689.	Livingstone's fruit bats (Pteropus livingstonii) are critically endangered and a captive population has been established as part of the International Union for Conservation of Nature Species Action Plan. The largest colony, in Jersey Zoo, was sampled for staphylococcal carriage and at infection sites, as disease associated with staphylococci had previously been found. Staphylococci were cultured …	Pteropus livingstonii	Frugivorous	Island of Jersey, UK	2014 -2016	wing skin, oropharyngeal mucosae,mouth ejecta and skin lesions	5% sheep blood agar	Staphylococcus xylosus, S. kloosii, S. nepalensis, S. simiae, S.aureus	oxytetracycline , amoxicillin , clindamycin, cephalexin , enrofloxacin , trimethoprim-sulfamethoxazole	None of the S. aureus isolates showed phenotypic resistance to methicillin (screening agar) and none was found to carry mecA or mecC. All staphylococci were broadly susceptible to antimicrobials with only one isolate showing resistance to four antimicrobial classes, three isolates to three classes, and the remaining isolates to one or two classes. Resistance occurred most commonly to amoxicillin …	Not deteced
25	Selvin J, Lanong S, Syiem D, De Mandal S, Kayang H, Kumar NS, Kiran GS. Culture-dependent and metagenomic analysis of lesser horseshoe bats' gut microbiome revealing unique bacterial diversity and signatures of potential human pathogens. Microb Pathog. 2019 Dec;137:103675. doi: 10.1016/j.micpath.2019.103675. Epub 2019 Aug 29. PMID: 31473248; PMCID: PMC7127535.	Bats are highly diverse and ecologically important mammals. They harbor various bacteria, viruses, and fungal communities that are either beneficial or potentially pathogenic. Extensive metagenomic studies in bats are limited, particularly for the gut, and to date, there are no reports on the bacterial diversity of Rhinolophus monoceros from Meghalaya, India. There are limited studies on the isol…	Rhinolophus monoceros	Insectivorous	India	Not available	Gut sample	Bertani Agar, Brain Heart Infusion Agar, Nutrient Agar,Trypticase Soy Agar medium.	Halfnia alvei (6 isolates) Escherichia furgusonii (5 isolates) Bacillus anthracis (4 isolates) (only showing predominant isolaets)	Ciprofloxacin, Tetracycline, Penicillin G, Chloramphenicol, Vancomycin, Cefoxitin	Escherichia furgusonii (5 isolates): ceftazidime (20%), Bacillus anthracis (4 isolates) : ciprofloxacin (25%), Tetracycline (25%), orfloxacin (75%)	Not detected
26	Nowakiewicz A, Zięba P, Gnat S, Trościańczyk A, Osińska M, Łagowski D, Kosior-Korzecka U, Puzio I. Bats as a reservoir of resistant Escherichia coli: A methodical view. Can we fully estimate the scale of resistance in the reservoirs of free-living animals? Res Vet Sci. 2020 Feb;128:49-58. doi: 10.1016/j.rvsc.2019.10.017. Epub 2019 Oct 30. PMID: 31710964.	Bats are a poorly understood reservoir of pathogenic and multi-drug resistant microorganisms; therefore, the aim of the study was to analyze the presence of drug resistance among E. coli isolated from the species of bats occurring naturally in Poland. The strategy of isolation and identification of resistant strains from pooled and single-animal samples was based on selective media with cefotaxim…	Myotis daubentonii Plecotus auritus Eptesicus serotinus Myotis nattereri Pipistrellus nathusii P. pipistrellus	Insectivorous	Poland	2016-2018	Guano sample and rectal swab	MacConkey agar (Biomaxima, Lublin, Poland) with: cefotaxime (2 μg/ml), kanamycin (32 μg/ml), tetracycline (8 μg/ml), and chloramphenicol (16 μg/ ml) (	E. coli (38 isolates)	Disc diffusion and Micro dilution ( cefotaxime, ceftazidime, ampicillin, chloramphenicol, florfenicol, ciprofloxacin, nalidixic acid, gentamicin, kanamycin, streptomycin, tetracycline, trimetoprime, and sulfamethoxazole)	E. coli (38 isolates): Ampicillin (65.8%), cefotaxime (5.3%), Ceftazdime (5.3%), Chloramphenicol (34.2%), Colistin (7.9%), Trimethoprim (55.2%), Sulphamethoxazole (60.5%), Florfenicol (10.5%), Gentamicin (31.5%), Kanamycin (84.2%), Nalidixic acid (47.3%), Ciprofloxacin (28.9%), Streptomycin (50%), Tetracycline (36.8%)
27	Mbehang Nguema PP, Onanga R, Ndong Atome GR, Obague Mbeang JC, Mabika Mabika A, Yaro M, Lounnas M, Dumont Y, Zohra ZF, Godreuil S, Bretagnolle F. Characterization of ESBL-Producing Enterobacteria from Fruit Bats in an Unprotected Area of Makokou, Gabon. Microorganisms. 2020 Jan 19;8(1):138. doi: 10.3390/microorganisms8010138. Erratum in: Microorganisms. 2020 Sep 10;8(9): PMID: 31963801; PMCID: PM…	In Gabon, terrestrial mammals of protected areas have been identified as a possible source of antibiotic-resistant bacteria. Some studies on antibiotic resistance in bats have already been carried out. The main goal of our study was to detect extended-spectrum beta-lactamases (ESBLs) that are produced by enterobacteria from bats in the Makokou region in Gabon. Sixty-eight fecal samples were obtai…	Epomops franqueti	Frugivorous	Gabon	2017	Fecal sample	MacConkey agar	E. coli (6 isolates) K. pneumoniae (4 isolates) E. cloacae (1 isolates)	Disc Diffusion (Amoxicillin, Ampicillin, Amoxicillin/clavulanic acid, Ticarcillin, Ticarcillin/clavulanic acid, Piperacillin, Piperacillin/tazobactam, Cephalexin, Cefoxitin, Cefotaxime, Cefpodoxime, Ceftazidime, Cefepime, Aztreonam, Imipenem Ertapenem, Amikacin, Gentamycin, Kanamycin Netilmicin, Streptomycin, Tobramycin, Erythromycin, Fosfomycin, Tetracycline, Colistin, Trimethoprim/sulfamethoxaz…	E. coli (6 isolates): Amoxicillin (100%), Ampicillin (100%), Amoxicillin/clavulanic acid (16.16%), Ticarcillin (100%), Ticarcillin/clavulanic acid (83.33%), Piperacillin (83.33%), Cephalexin (100%), Cefoxitin (33.33%), Cefotaxime (100%), Cefpodoxime (100%), Ceftazidime(100%), Cefepime (66.67%), Aztreonam (100%), Ertapenem (33.33%), Amikacin (33.33%), Gentamycin (33.33%), Kanamycin (66.67%), Netil…	blaCTX-M-15 (100%, 11/11), blaSHV-11 (27.27%, 3/11) (this was done on overall detection)
			Megaloglossus woermanni
28	Gerbáčová K, Maliničová L, Kisková J, Maslišová V, Uhrin M, Pristaš P. The Faecal Microbiome of Building-Dwelling Insectivorous Bats (Myotis myotis and Rhinolophus hipposideros) also Contains Antibiotic-Resistant Bacterial Representatives. Curr Microbiol. 2020 Sep;77(9):2333-2344. doi: 10.1007/s00284-020-02095-z. Epub 2020 Jun 30. PMID: 32607823.	The bacteriome of bat faeces and bat guano is still not well known, despite the increasing knowledge of it as a potential source of pathogenic and/or antibiotic-resistant species. In this study, the faecal microbiome composition of two building-dwelling insectivorous bat species (Myotis myotis and Rhinolophus hipposideros) was analysed using cultivation-based and non-cultivation-based approaches.…	Myotis myotis and Rhinolophus hipposideros	Insectivorous	Slovakia	2017	Fecal sample and Guano sample	Trypticase soy Agar	Arthrobacter gangotriensis, Escherichia marmotae, Micrococcus yunnanensis, Bacillus weidmanniim, Rahnella woolbedingensis R. hipposideros: R. woolbedingensis, Serratia liquefaciens, S. fonticola, Eubacterium budayi, Sporosarcina luteola, S. contaminans, Staphylococcus nepalensis and Obesumbacterium proteus	Disc diffusion (ampicillin (8 mg/L), tetracycline (2 mg/L), chloramphenicol (8 mg/L) and vancomycin (4 mg/L))	Arthrobacter sp: ampicillin (7%), C (50%), tetracycline (0%) vancomycin (50%), Kocuria sp.: Chloramphenicol (18%), Vancomycin (18%). Staphylococcus nepalensis : Vancomycin (94%)	Not detected
29	García LA, Torres C, López AR, Rodríguez CO, Espinosa JO, Valencia CS. Staphylococcus Spp. from Wild Mammals in Aragón (Spain): Antibiotic Resistance Status. J Vet Res. 2020 Sep 16;64(3):373-379. doi: 10.2478/jvetres-2020-0057. PMID: 32984626; PMCID: PMC7497752.	Introduction: Antimicrobial resistance is a global health threat. It has been studied in humans and domestic animals, but there is a lack of data on wild animals. The objective of this study is the elucidation of its patterns in Staphylococcus spp. isolated from wild mammals of the Autonomous Community of Aragón (Spain). Material and methods: A total of 103 mammals (Artiodactyla, Carnivora, Chiro…	Tadarida teniotis	insectivorous	Spain	2012-2015	Nasal and rectal samples	mannitol salt agar	Staphylococcus sciuri (1 isolates)	Disc Diffusion Penicillin cefoxitin, teicoplanin tetracycline, erythromycin, clindamycin, chloramphenicol, gentamicin, tobramycin, streptomycin , lincomycin , ciprofloxacin , sulfamethoxazole-trimethoprim , fusidic acid and mupirocin	Erythromycin (100%), Streptomycin (100%)	Not detected
30	Skok, Sara, Kogovšek, Blaž, Tomazin, Rok, Šturm, Samo, Avguštin, Jerneja Ambrožič , & Mulec, Janez. (2020). Antimicrobial resistant Escherichia coli from karst waters, surfaces and bat guano in Slovenian caves. J Acta Carsologica, 49(2-3).	Escherichia coli, one of the primary intestinal commensal bacteria in humans and endothermic animals, is commonly considered an indicator of faecal pollution. E. coli strains were isolated from karst rivers under different hydrological conditions, from footpaths in tourist caves and from bat guano. Isolates were tested for phenotypic resistance to ampicillin, chloramphenicol, ciprofloxacin, nalid…	Miniopterus schreibersii, Myotis myotis, Myotis blythii Myotis capaciinii	Insectivorous	Slovenia	2018	Guano samples	E. coli selection medium, Coliforms Chromogenic Agar	E. coli isolates (73 isolates)	gradient diffusion method (ampicillin, Chloramphenicol, Ciprofloxacin, Nalidixic acid, Tetracycline, Trimethoprim)	E. coli isolates (73 isolates): Ciprofloxacin (1.4%), Nalidixic acid (1.4%), Trimethoprim(1.4%)	Not detected
31	McDougall FK, Wyres KL, Judd LM, Boardman WSJ, Holt KE, Power ML. Novel strains of Klebsiella africana and Klebsiella pneumoniae in Australian fruit bats (Pteropus poliocephalus). Res Microbiol. 2021 Nov-Dec;172(7-8):103879.	Over the past decade human associated multidrug resistant (MDR) and hypervirulent Klebsiella pneumoniae lineages have been increasingly detected in wildlife. This study investigated the occurrence of K. pneumoniae species complex (KpSC) in grey-headed flying foxes (GHFF), an Australian fruit bat. Thirty-nine KpSC isolates were cultured from 275 GHFF faecal samples (14.2%), comprising K. pneumonia…	Pteropus poliocephalus	Frugivorous	Australia	2021	faecal samples	Ampicillin, Amoxicillin/Clavulanic Acid, Cephalexin, Cefotaxime, Imipenem, Nalidixic acid, Trimethoprim, Trimethoprim/Sulfamethoxazole, Amikacin	K. pneumoniae (n= 30), Klebsiella africana (n = 8) and Klebsiella variicola subsp. variicola (n = 1).	modified SCAI medium	K. pneumoniae species complex (KpSC) (39 isolates): Ampicillin (100%), Amoxicillin (100%), Ciprofloxacin (75%), Trimethoprim (33.3%),	blaSHV-110 (38.46%), blaSHV-1 (20.5%), blaSHV-27 (7.6%), SHV-11 v1^ (7.6%), SHV-229* (2.5%), LEN-2^(2.5%), OKP-C-1^ (20.5%)
32	McDougall FK, Boardman WSJ, Power ML. Characterization of beta-lactam-resistant Escherichia coli from Australian fruit bats indicates anthropogenic origins. Microb Genom. 2021 May;7(5):000571. doi: 10.1099/mgen.0.000571.	Antimicrobial-resistant Escherichia coli , particularly those resistant to critically important antimicrobials, are increasingly reported in wildlife. The dissemination of antimicrobial-resistant bacteria to wildlife indicates the far-reaching impact of selective pressures imposed by humans on bacteria through misuse of antimicrobials. The grey-headed flying fox (GHFF; Pteropus poliocephalus), a …	Pteropus poliocephalus	Frugivorous	Australia	2021	faecal samples	Ampicillin, Amoxicillin/Clavulanic Acid, Cephalexin, Cefotaxime, Imipenem, Nalidixic acid, Trimethoprim, Trimethoprim/Sulfamethoxazole, Amikacin	Amoxicillin-resistant E. coli= 13 isolates	Chromocult Coliform Agar	E. coli (13 isolates) Ampicillin (69.2%), Amoxicillin (100%), Trimethoprim/Sulfamethoxazole (30.8%), Tetracycline (30.8%), Cephalexin (2%)	aph(3″)-Ib + aph(6)-Id 15%), blaCTX-M-27 (7.6%), blaTEM-1B (84%), catA2 (7.6%), dfrA14+sul2 (3), parC/parE/gyrA (7.6%), tet(A) (8), aadA5 (7.6%), qnrS1 (7.6%), blaTEM-1A (7.6%), ampC (1), aph(3')-Ia (7.6%), aadA1 (7.6%)
33	Nowakiewicz A, Zięba P, Gnat S, Osińska M, Łagowski D, Kosior-Korzecka U, Puzio I, Król J. Analysis of the occurrence and molecular characteristics of drug-resistant strains of Enterococcus faecalis isolated from the gastrointestinal tract of insectivorous bat species in Poland: A possible essential impact on the spread of drug resistance? Environ Pollut. 2021 Jan 15;269:116099.	Bats are poorly understood as a reservoir of multidrug-resistant strains; therefore, the aim of this study was to determine molecular characterization of multidrug-resistant Enterococcus strains isolated from bat species from Poland. A multi-stage analysis based on targeted isolation of drug-resistant strains (selective media with tetracycline, chloramphenicol, gentamicin, streptomycin, and vanco…	Myotis daubentonii Plecotus auritus Eptesicus serotinus Myotis nattereri Pipistrellus nathusii P. pipistrellus	Insectivorous	Poland	2016-2018	Guano sample and rectal swab	MacConkey agar (Biomaxima, Lublin, Poland) with: cefotaxime (2 μg/ml), kanamycin (32 μg/ml), tetracycline (8 μg/ml), and chloramphenicol (16 μg/ ml) (	Enterococcus faecalis (107 isolates)	Ampicillin, Chloramphenicol, Ciprofloxacin, Erythromycin, Gentamycin, Kanamycin, Rifampin, Streptomycin, Tetracycline, Vancomycin	Enterococcus faecalis (107 isolates): Chloramphenicol (16.7%), Ciprofloxacin (11.1%), Erythromycin (19.4%), Gentamycin (30.6%), Kanamycin (38.9%), Rifampin (33.3%), Streptomycin (41.7%), Tetracycline (69.4%)	Int-Tn (77.8%), aac(6’)-Ie-aph (2”)-Ia (38.9%), aph(3’)-IIIa (16.7%), ant(6)-Ia (22.2%), ermB (27.8%), tetM (52.8%), tetL (19.4%), cat7 (16.7%), cat9 (8.3%), fexA (2.8%), tcrB (11.1%) efaAfs (94.4%), cpd,cob,ccf (100%), agg (38.9%), gelE (91.7%), esp (11.1%), cylA (13.9%), cylB (22.2%), cylM (13.9%)
34	Obodoechi LO, Carvalho I, Chenouf NS, Martínez-Álvarez S, Sadi M, Nwanta JA, Chah KF, Torres C. Antimicrobial resistance in Escherichia coli isolates from frugivorous (Eidolon helvum) and insectivorous (Nycteris hispida) bats in Southeast Nigeria, with detection of CTX-M-15 producing isolates. Comp Immunol Microbiol Infect Dis. 2021 Apr;75:101613.	Thirty-five Escherichia coli isolates obtained from the liver, spleen and intestines of 180 frugivorous and insectivorous bats were investigated for antimicrobial resistance phenotypes/genotypes, prevalence of Extended-Spectrum beta-lactamase (ESBL) production, virulence gene detection and molecular typing. Eight (22.9 %) of the isolates were multidrug resistant (MDR). Two isolates were cefotaxim…	Eidolon helvum Nycteris hispida	Frugivorous insectivorous	Nigeria	2019	Liver, spleen, intestine	MacConkey agar	E. coli (35 isolates)	Ampicillin , Amoxicillin/clavulanic acid, Cefotaxime, Ceftazidime, Chloramphenicol, Ciprofloxacin, Gentamicin, Streptomycin, Sulfamethoxazole/ trimethoprim (SXT) Tetracycline	E. coli (35 isolates): Ampicillin (48.6%), Amoxicillin/clavulanic acid (8.6%) Cefotaxime (5.7%) Ceftazidime (2.9%), Chloramphenicol (8.6%) Ciprofloxacin (11.4%) Gentamicin (20 %) Streptomycin (8.6%) Sulfamethoxazole/ trimethoprim (SXT) (22.9%) Tetracycline (37.1%)	blaCTX-M-15 (5.7%), tetA (40%), blaTEM (22.8%), int1 (20%), aac(3)II (2.85%)
35	Benavides JA, Godreuil S, Opazo-Capurro A, Mahamat OO, Falcon N, Oravcova K, Streicker DG, Shiva C. Long-term maintenance of multidrug-resistant Escherichia coli carried by vampire bats and shared with livestock in Peru. Sci Total Environ. 2022	Extended-spectrum beta-lactamase-producing Escherichia coli (ESBL-E. coli) have been reported in wildlife worldwide. Whether wildlife is a transient host of ESBL-E. coli or comprises an independently maintained reservoir is unknown. We investigated this question by longitudinally monitoring ESBL-E. coli in common vampire bats and nearby livestock in Peru. Among 388 bats from five vampire bat colo…	Desmodus rotundus	Sanguivorous	Peru	2015-2018	Fecal sample	ChromID ESBL agar	ESBL E. coli (18 isolates)	Amoxicillin, Amoxicillin+Clavulanic acid, Aztreonam, Ticarcillin, Ticarcillin+Clavulanic acid, Piperacillin, Piperacillin+Tazobactam, Temocillin, Cefalexin, Cefoxitin, Cefotaxim, Ceftazidime, Cefepime, Imipenem, Ertapenem, Nalidixic acid, Ofloxacin, Ciprofloxacin, Levofloxacin, Fosfomycin, Gentamicin, Tobramycin, Netilmicin, Amikacin, Chloramphenicol, Trimethoprime+Sulfamides	Amoxicillin (100%), Amoxicillin+Clavulanic acid (77%), Aztreonam (100%) Ticarcillin (100%), Ticarcillin+Clavulanic acid (61%), Piperacillin (100%), Piperacillin+Tazobactam (5.55%), Temocillin (16.67%), Cefalexin (100%), Cefotaxime (100%), Ceftazidime (72.2%), Cefepime (100%), Nalidixic acid (83.33%), Ofloxacin (83.33%), Ciprofloxacin (83.33%), Levofloxacin (83.33%), Fosfomycin (50%), Gentamicin (…	aac(3)-IIa-like (38.9%), aac(3)-IVa-like (0%), aac(3)-IId-like (5.6%), aac(6')Ib-cr-like (44.4%), aadA1 (55.6%), aacA4-like (16.7%), aadA2-like (16.7%), aadA3-like (5.6%), aadA5 (38.9%), aadA17-like (0%), aadA24-like (0%), aadB (5.6%), aph(3')-Ia (5.6%), aph(3')-IIa-like (22.2%), aph(3')-Ic-like (33.3%), aph(4)-Ia (5.6%), stra (61.1%), strb (61.1%), blaCTX-M-15 (38.9%), blaCTX-M-14 (0%), blaCTX-M…
36	McDougall F, Boardman W, Power M. High Prevalence of Beta-Lactam-Resistant Escherichia coli in South Australian Grey-Headed Flying Fox Pups (Pteropus poliocephalus). Microorganisms. 2022 Aug 7;10(8):1589.	The emergence of antimicrobial-resistant Escherichia coli in wildlife is concerning-especially resistance to clinically important beta-lactam antibiotics. Wildlife in closer proximity to humans, including in captivity and in rescue/rehabilitation centres, typically have a higher prevalence of antimicrobial-resistant E. coli compared to their free-living counterparts. Each year, several thousand A…	Pteropus poliocephalus	Frugivorous	Australia	2022	faecal samples	Chromocult Coliform Agar	E. coli: (49 isolates)	Ampicillin, Amoxicillin/Clavulanic Acid, Cephalexin, Cefotaxime, Imipenem, Nalidixic acid, Trimethoprim, Trimethoprim/Sulfamethoxazole, Amikacin, Gentamycin, Streptomycin, Spectinomycin, Chloramphenicol, Nitrofurantoin, Tetracycline	E. coli (12 isolates): Ampicillin (100%), Amoxicillin (100%) Amoxicillin/Clavulanic Acid (17%), Cephalexin (8.3%), Cefotaxime (8.3%), Trimethoprim (17%), Trimethoprim/Sulfamethoxazole (8.3%), Streptomycin (8.3%, Spectinomycin (8.3%), Tetracycline (58.33%)	aph(3″)-Ib + aph(6)-Id (17%), blaTEM-1B (75%), tet(B) (17%), aadA5 (SH-I) (8.3%), dfrA17 + sul2 (8.3%), tet(A) (41.67%), dfrA5 + sul2 (8.3%), catA1(8.3%), blaTEM-1C (8.3%), blaCMY-2 (8.3%), blaTEM-33 (8.3%)
37	García, L.A., Torres, C., López, A.R., Rodríguez, C.O. and Valencia, C.S., 2022. Antimicrobial resistance of species isolated from wild mammals in Aragón, Spain. Journal of Veterinary Research.	Introduction: Antimicrobial resistance is currently one of the major public health threats. In order to prevent its spread, the WHO, OIE and FAO have formed an alliance to promote the study of antibiotic resistance evolution in human, animal and environmental bacteria posing a public health threat; however, the studies performed in wild animals are scarce so far. The main objective of this study …	Tadarida teniotis	Insectivorous	Spain	2012-2015	Rectal samples	Slanetz and Bartley Agar Columbia blood agar base	Enterococcus (2 isolates)	vancomycin, teicoplanin, ampicillin, streptomycin, gentamicin , chloramphenicol tetracycline , erythromycin , quinupristin-dalfopristin, ciprofloxacin	Enterococcus (2 isolates): erythromycin (50%) , quinupristin-dalfopristin (100%), ciprofloxacin (50%)	Not detected
38	Oladiran, Famurewa, Ogunlade Ayodele Oluwayemisi, Oluwakemi Abike, Antonia Olufunke, and Oluwatoyin Modupe. "Molecular Characterization of Resistance and Virulence Genes in Escherichia coli Isolated from Bats (Eidolon helvum) Faeces in Osun State, Nigeria." Journal of Advances in Microbiology (2022): 37-48.	Escherichia coli is one of the primary intestinal commensal organisms found in endothermic animals and hence, it is widely disseminated in the environment. A total of 36 (10.68%) Escherichia coli was isolated from 101 faecal samples collected from straw coloured fruit bats (Eidolon helvum) faeces from three different major cities (Ile-Ife, Osogbo and Ilesa) in Osun State, Nigeria. The E. coli iso…	Eidolon helvum	Frugivorous	Nigeria	Not available	faecal samples	Eosin methylene blue (EMB) agar	E. coli (36 isolates)	cefotaxime , ampicillin, amoxicillin, augmentin, cefoxitin, ceftazidime, cefuroxime, ofloxacin , cefixime, gentamicin , ciprofloxacin, nitrofurantoin, sulphonamethaxzole-trimethoprim, meropenem, ertapenem.	E. coli (36 isolates): augumentin (83.33%), cefuroxime (69.44%), ceftazidime (55.55%), amoxicillin (38.88%), cefotaxime (33.33%), eterpenem (11.11%), meropenem (11.11%), and tetracycline (11.11%), nitrofurantoin (8.33%)	TEM
